# Supplementary material for: Loss of toll-like receptor 5 potentiates spontaneous hepatocarcinogenesis in farnesoid X receptor–deficient mice
Source: PubMed Central journal article supplement — Hepatol Commun. 2023 May 23;7(6):e0166. doi: 10.1097/HC9.0000000000000166 (PMC10208708; doi:10.1097/hc9.0000000000000166), 2023-05-23
Supplement: hc9-7-e0166-s003.pdf [file hc9-7-e0166-s003.pdf]

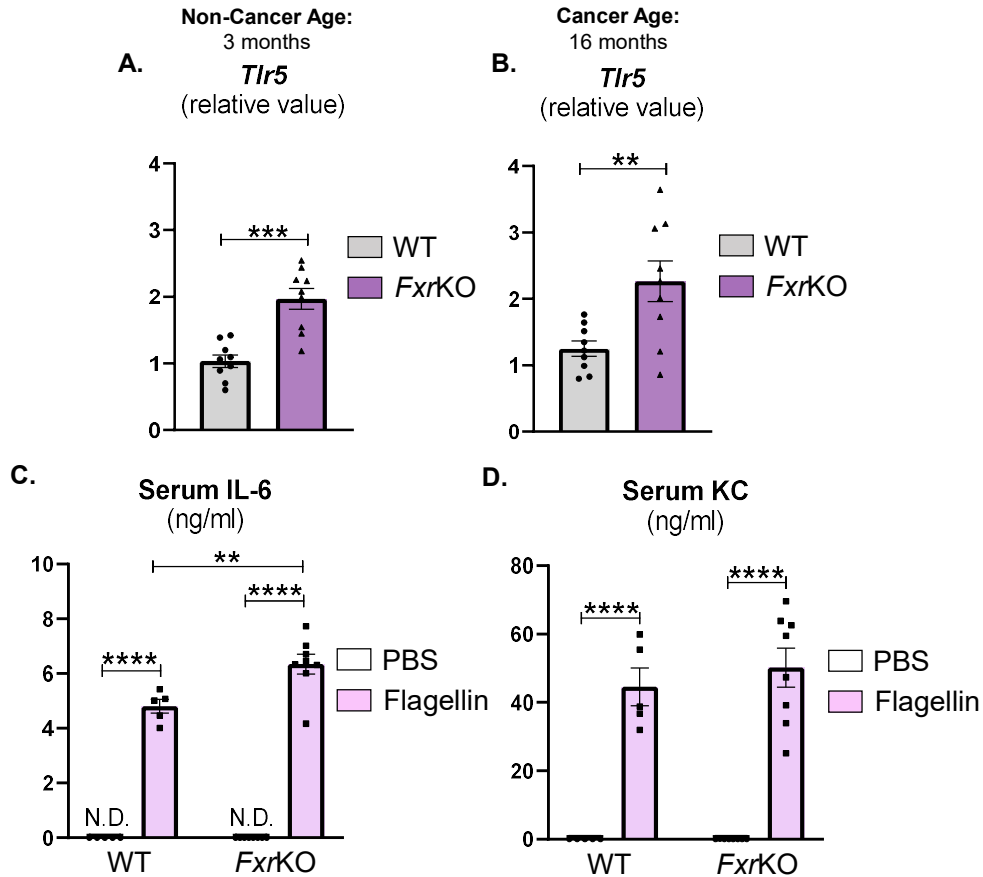

**Supplemental Figure S1: *FxrKO* mice have increased *Tlr5* expression and innate immune response to flagellin challenge.** (A-B) Male WT (n=9) and *FxrKO* (n=9) mice were aged either to (A) 3 months or (B) 16 months old and hepatic *Tlr5* expression was measured by RT-qPCR. (C-D) Male WT (n=5) and *FxrKO* (n=9) mice were given either PBS or flagellin (10  $\mu$ g/mouse, *i.p.*) and serum was collected after 2 h for (C) IL-6 and (D) KC via ELISA. Results are expressed as means  $\pm$  SEM. \* $p$ <0.05, \*\* $p$ <0.01, \*\*\* $p$ <0.001 and \*\*\*\* $p$ <0.0001.
