# Supplementary material for: Loss of toll-like receptor 5 potentiates spontaneous hepatocarcinogenesis in farnesoid X receptor–deficient mice
Source: PubMed Central journal article supplement — Hepatol Commun. 2023 May 23;7(6):e0166. doi: 10.1097/HC9.0000000000000166 (PMC10208708; doi:10.1097/hc9.0000000000000166), 2023-05-23
Supplement: hc9-7-e0166-s004.pdf [file hc9-7-e0166-s004.pdf]

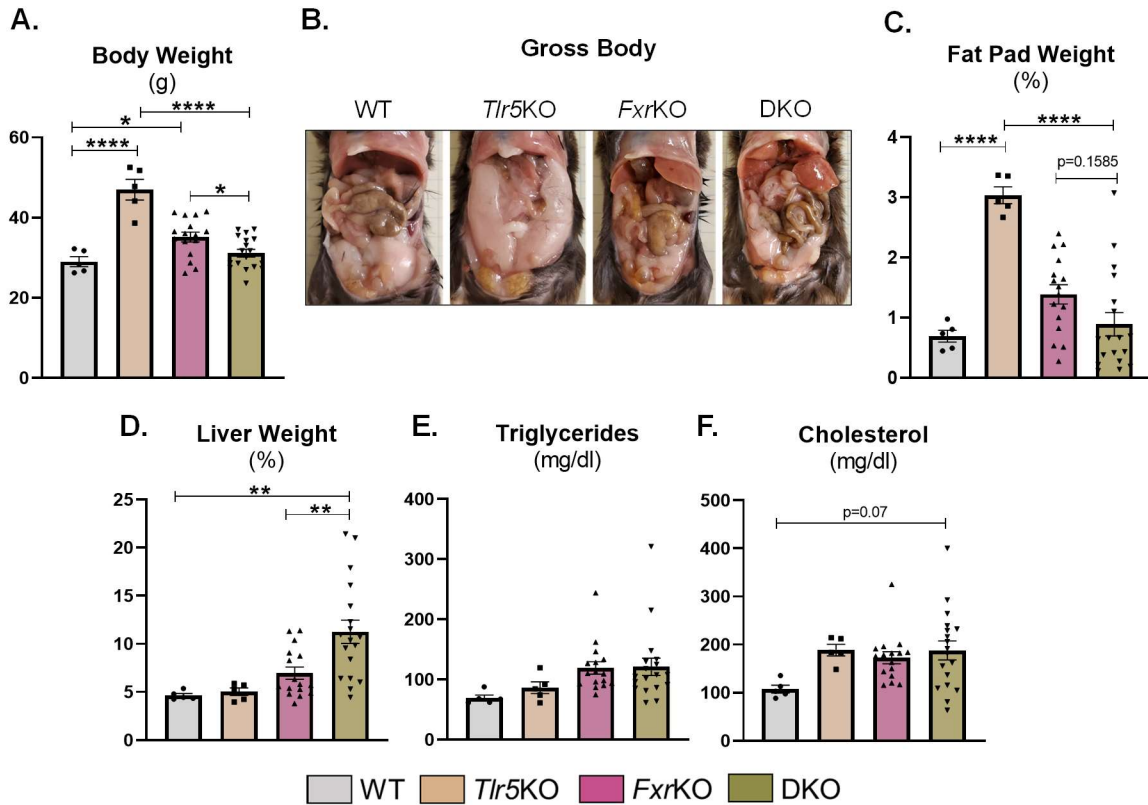

**Supplemental Figure S2: Aged DKO mice exhibit hyperlipidemia and hepatomegaly but have diminished adiposity.** (A-F) Male WT (n=5), *Tlr5*KO (n=5), *Fxr*KO (n=16), and DKO (n=18) mice were aged for 16 months and analyzed for physical and serological characteristics. (A) Body weight (%), (B) abdominal photograph, (C) fat pad weight (%), (D) liver weight (%), (E) serum triglycerides and (F) serum total cholesterol. Results are expressed as means  $\pm$  SEM. \* $p < 0.05$ , \*\* $p < 0.01$ , \*\*\* $p < 0.001$  and \*\*\*\* $p < 0.0001$ .
