# Supplementary material for: Loss of toll-like receptor 5 potentiates spontaneous hepatocarcinogenesis in farnesoid X receptor–deficient mice
Source: PubMed Central journal article supplement — Hepatol Commun. 2023 May 23;7(6):e0166. doi: 10.1097/HC9.0000000000000166 (PMC10208708; doi:10.1097/hc9.0000000000000166), 2023-05-23
Supplement: hc9-7-e0166-s005.pdf [file hc9-7-e0166-s005.pdf]

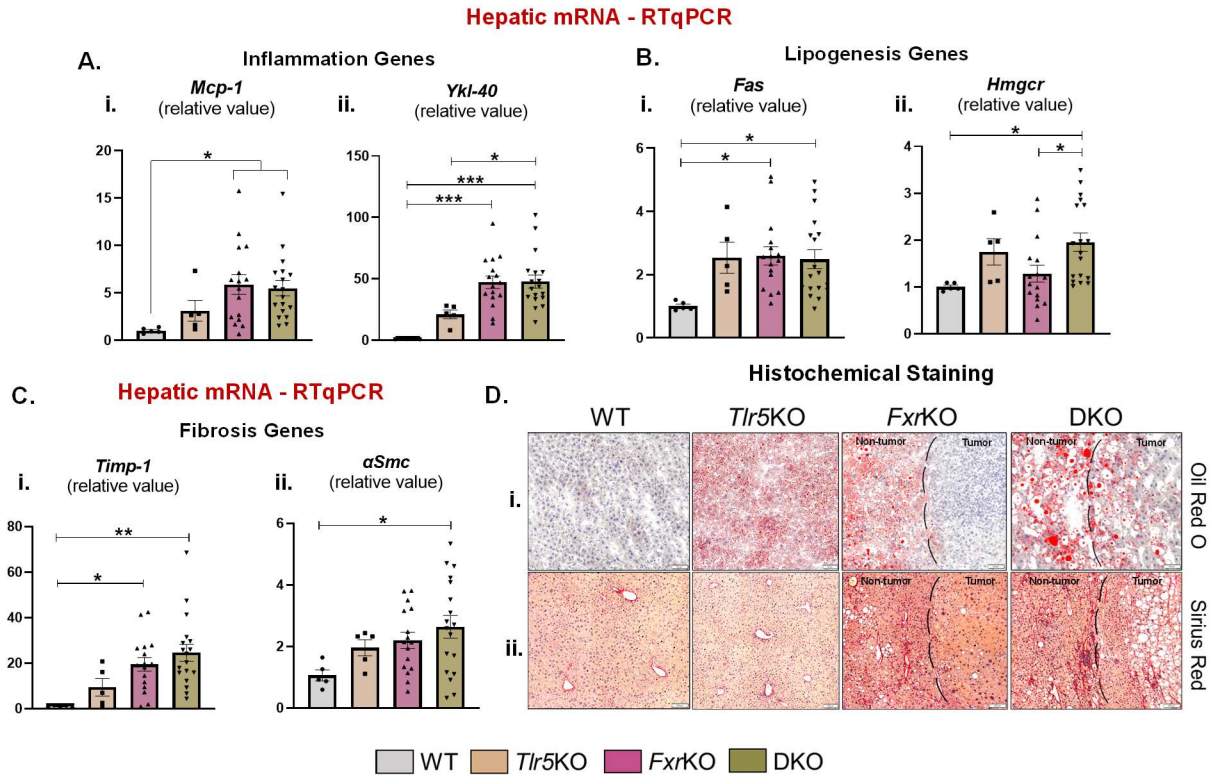

**Supplemental Figure S3: DKO mice have a steatohepatic HCC variant but no additive increase in inflammation nor fibrosis.** (A-D) Male WT (n=5), *Tlr5*KO (n=5), *Fxr*KO (n=16), and DKO (n=18) mice were aged for 16 months and analyzed for inflammatory, steatosis, and fibrosis markers. Hepatic RT-qPCR for (A) inflammation transcripts **i.** *Mcp-1* and **ii.** *Ykl-40*, (B) lipogenesis transcripts **i.** *Fas* and **ii.** *Hmgcr*, and (C) fibrosis transcripts **i.** *Timp-1* and **ii.**  $\alpha$ *Smc*. 36b4 was used as internal control for RT-qPCR. (D) Histological staining of **i.** Oil red O (scale bar, 50  $\mu$ m) and **ii.** Picosirius red (scale bar, 100  $\mu$ m) for lipid droplets and collagen, respectively. Results are expressed as means  $\pm$  SEM. \* $p < 0.05$ , \*\* $p < 0.01$ , \*\*\* $p < 0.001$  and \*\*\*\* $p < 0.0001$ .
