# Supplementary material for: Loss of toll-like receptor 5 potentiates spontaneous hepatocarcinogenesis in farnesoid X receptor–deficient mice
Source: PubMed Central journal article supplement — Hepatol Commun. 2023 May 23;7(6):e0166. doi: 10.1097/HC9.0000000000000166 (PMC10208708; doi:10.1097/hc9.0000000000000166), 2023-05-23
Supplement: hc9-7-e0166-s006.pdf [file hc9-7-e0166-s006.pdf]

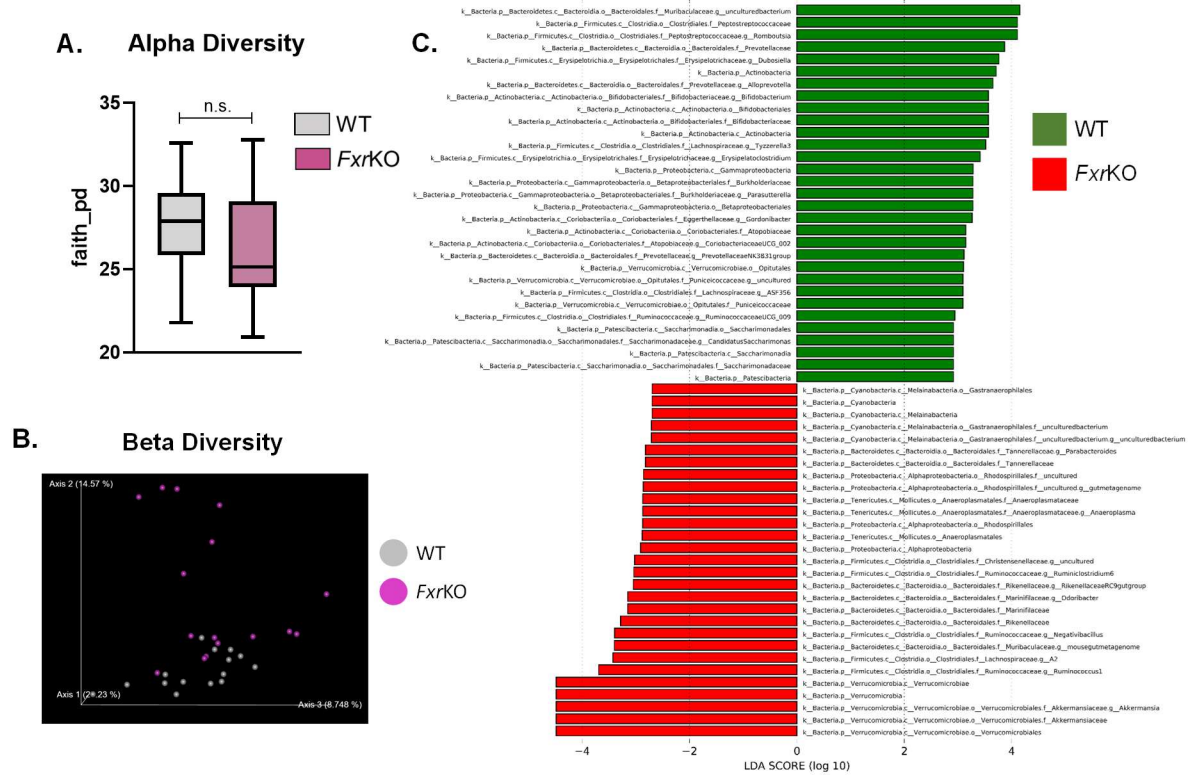

**Supplemental Figure S4: *FxrKO* mice with HCC have a bloom of Verrucomicrobia, Tenericutes and Cyanobacteria.** (A-C) Male WT (n=15) and *FxrKO* (n=16) mice were aged for 16 months, fecal samples were snap frozen and bacterial DNA was extracted for 16S microbiota analysis. (A)  $\alpha$ -diversity, (B)  $\beta$ -diversity via Bray-Curtis, and (C) Linear discriminant analysis Effect Size (LEfSe) comparing WT and *FxrKO*. Results are expressed as means  $\pm$  SEM. N.S., non-significant.
