# Supplementary material for: Loss of toll-like receptor 5 potentiates spontaneous hepatocarcinogenesis in farnesoid X receptor–deficient mice
Source: PubMed Central journal article supplement — Hepatol Commun. 2023 May 23;7(6):e0166. doi: 10.1097/HC9.0000000000000166 (PMC10208708; doi:10.1097/hc9.0000000000000166), 2023-05-23
Supplement: hc9-7-e0166-s007.pdf [file hc9-7-e0166-s007.pdf]

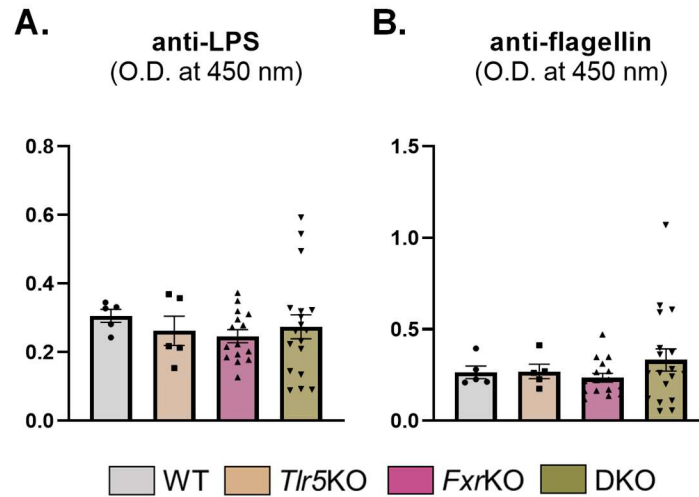

**Supplemental Figure S5: No changes in immunoreactivity to bacterial products between *Fxr*KO and DKO mice.** (A-B) Male WT (n=5), *Tlr5*KO (n=5), *Fxr*KO (n=16), and DKO (n=18) mice were aged for 16 months and analyzed for serum immunoreactivity to (A) lipopolysaccharide (LPS) and (B) flagellin by ELISA. Results are expressed as means  $\pm$  SEM.
